# Supplementary material
Source: HighWire-hosted journal article supplement (https://jnm.snmjournals.org/highwire/filestream/93884/field_highwire_adjunct_files/0/jnm37226_supplemental_data.pdf)
Supplement: jnm37226_supplemental_data.pdf [file jnm37226_supplemental_data.pdf]

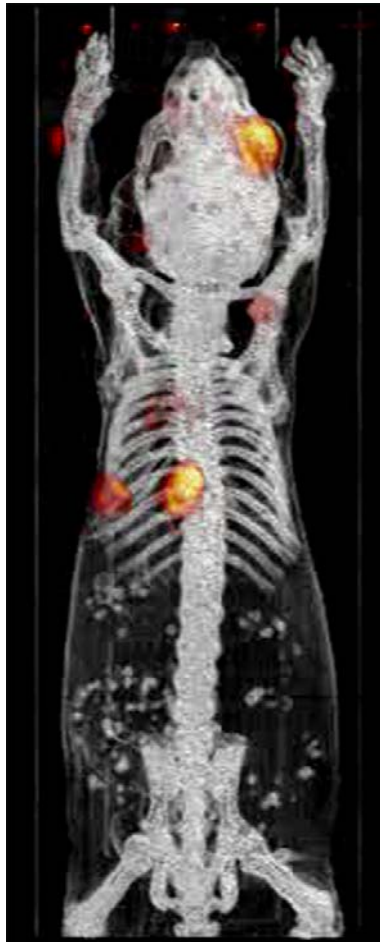

**SUPPLEMENTAL FIGURE 1.** Three-dimensional rendering of  $^{18}\text{F}$ -FHBG PET/CT image of nude mouse 35 d after intracardiac injection of  $1.5 \times 10^6$  A375M-3F cells.  $^{18}\text{F}$ -FHBG PET data are displayed in yellow-red, and CT data in gray scale. This representation allows assessment of tumor burden on single image with presence of appropriate anatomic landmarks. See the accompanying supplemental video for a rotating representation.
